# Supplementary material
Source: ML conference proceedings conference paper supplement (https://openaccess.thecvf.com/content/ICCV2023/html/Wu_MixCycle_Mixup_Assisted_ICCV_2023_paper.html)
Supplement: Supplementary file 1 [file Wu_MixCycle_Mixup_Assisted_ICCV_2023_supplemental.pdf]

# MixCycle: Mixup Assisted Semi-Supervised 3D Single Object Tracking with Cycle Consistency

## Supplementary

Qiao Wu<sup>1</sup> Jiaqi Yang<sup>1\*</sup> Kun Sun<sup>2</sup> Chu'ai Zhang<sup>1</sup> Yanning Zhang<sup>1</sup> Mathieu Salzmann<sup>3</sup>

<sup>1</sup> Northwestern Polytechnical University <sup>2</sup> China University of Geosciences, Wuhan

<sup>3</sup> École Polytechnique Fédérale de Lausanne

qiaowu@mail.nwpu.edu.cn; jqyang@nwpu.edu.cn; sunkun@cug.edu.cn;

cazhang@mail.nwpu.edu.cn; ynzhang@nwpu.edu.cn; mathieu.salzmann@epfl.ch

### A. Implementation Details

**Framework Architecture.** The overall pipeline with the grad flow of MixCycle is shown in Fig. 1. Due to the limitation of non maximum suppression (NMS) on gradient back-propagation, we only calculate the gradients of the directly supervised parts.

**SOTMixup.** Given the mix point cloud  $P_A^m = P_A^b + \hat{P}_A^o + \hat{P}_B^o$  and Bounding-box  $B_A$  in label  $y_A$  at the SOTMixup, we only regard the points in  $B_A$  as the foreground points. Specifically, the points in  $\hat{P}_B^o$  are considered as background noise if they are outside the  $B_A$ . We believe that modifying the size of the tracking target is incompatible with real tracking.

### B. More Analysis

**Training & Inference Time.** We compare MixCycle and fully-supervised methods [1, 2, 4] in training time shown in Tab. 1. They are trained on Car in KITTI with 10% labels using 2 NVIDIA RTX-3090 GPUs. Our MixCycle takes around 2.0 ~ 2.5 times as long as the fully-supervised methods. The experiments reveal that MixCycle requires a longer training time, but it is still in an acceptable range. Hence, we could expect a faster and more robust tracking network backbone for MixCycle.

**Frame Number of Cycle Tracking and Unlabeled Data Losses Balance.** 1) Because of the limited memory of an NVIDIA RTX-3090 GPU, only a maximum of 2 cycle consistencies among 3 frames can be supervised. Therefore, we only present the losses for the self-supervised part. 2) For the one without labels part, we have made experiments to balance those losses. We try to supervise different consistencies in a two-stage training by supervising  $\mathcal{L}_{self}$  and  $\mathcal{L}_{con0}$  in stage 1, and  $\mathcal{L}_{self}$  and  $\mathcal{L}_{con1}$  in stage 2,

Table 1. Training time comparison of MixCycle and fully-supervised methods on Car in KITTI with 10% labels using 2 NVIDIA RTX-3090 GPUs. Decreases based on the same tracker is shown in red.

| Method        | Time  |        |
|---------------|-------|--------|
| P2B [1]       | 1h22m |        |
| MLVSNet [2]   | 1h47m |        |
| BAT [4]       | 1h22m |        |
| Ours(P2B)     | 3h35m | 2h13m↓ |
| Ours(MLVSNet) | 3h32m | 1h45m↓ |
| Ours(BAT)     | 3h40m | 2h18m↓ |

based on BAT with a 10% sampling rate on KITTI. Without SOTMixup, the cycle framework achieves 38.8/59.3 and 41.0/60.6 in Succ./Prec. in stage 1 & 2, respectively. The performance drops in stage 2 if we use SOTMixup. We conjecture this to be due to conflicts between the delicate losses set by SOTMixup in Self Cycle and the ambiguous losses in F.B. Cycle. We leave the design of a better training strategy for MixCycle as future work.

### Fairness of Comparison with Fully-supervised Method.

Here we discuss fairness in the comparison experiments. The fully supervised method solely relies on labeled data, whereas our method utilizes both labeled and unlabeled data. 1) The intention of our work is to reduce the effort in data annotation. While reducing the cost of collecting data is also important, we constitute a different research task on its own. 2) We refer to a semi-supervised 3D object detection method SESS's [3] experimental setting for comparison experiments. SESS directly reduces the usage of data of fully supervised methods for comparison experiments because no other method shares the same semi-supervised settings with it, which is very similar to our situation. 3) We present the performance comparison using the same amount of data but with different label usage in the Tab.3 and Tab.4

\*Corresponding author

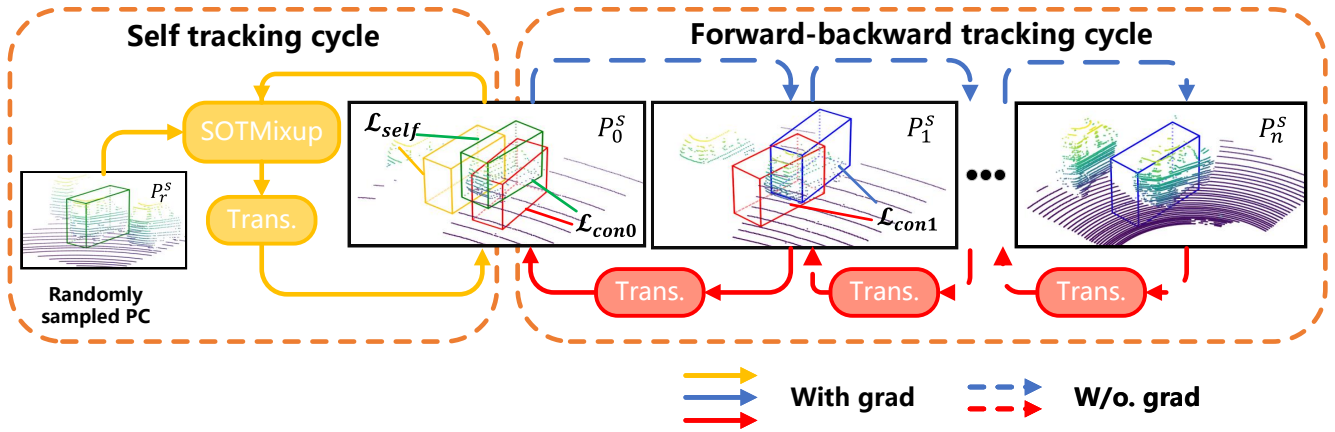

Figure 1. The framework of MixCycle. The gradient flow is represented by solid and dashed lines with arrows.

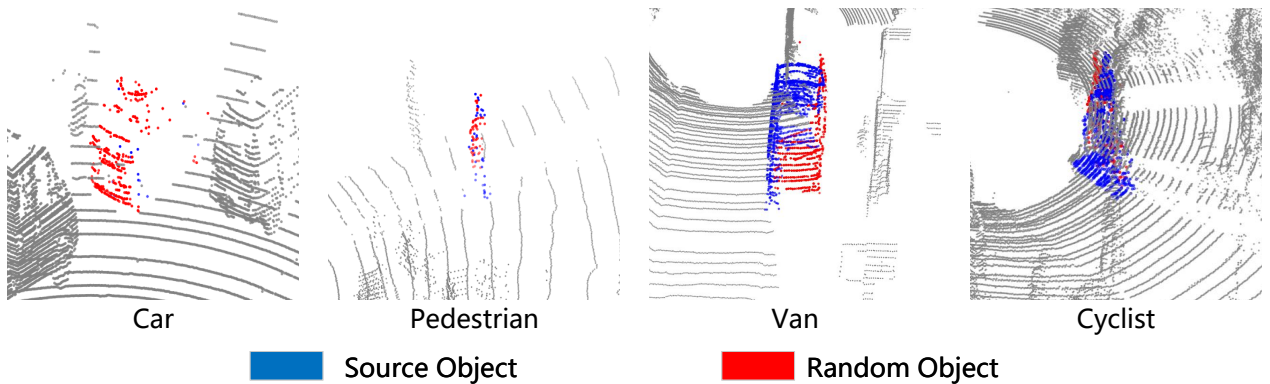

Figure 2. Visualization of SOTMixup.

of the paper.

**Further Details.** We further demonstrate the test result on each category and sample rate on KITTI and Nuscenes shown in Tab. 2 and Tab. 3. We achieve great success on Cyclist. The maximum improvement on the Cyclist class is up to **44.77%/75.83%** in success/precision based on P2B [1] with 10% labels. For the most important class Car in KITTI and NuScenes, MixCycle also achieves a remarkable improvement in every sample rate.

### C. Visualization

**SOTMixup.** Our MixCycle leverages SOTMixup to supply diverse training samples. As shown in Fig. 2, we present SOTMixup in a variety of categories. Our SOTMixup completes the point cloud of the occluded area in the Van in Fig. 2, making the training samples more diverse. In the Car in Fig. 2, SOTMixup almost removes the point cloud of the source object, allowing the trackers to regress the correct target center by learning the distribution of object motion in extreme cases.

**KITTI Results.** We present the visualization results of the comparison between Our MixCycle and BAT [4] with 10%

sample rate in Fig. 3. The visualization results further validate the superiority of our approach in sparse and complex scenarios.

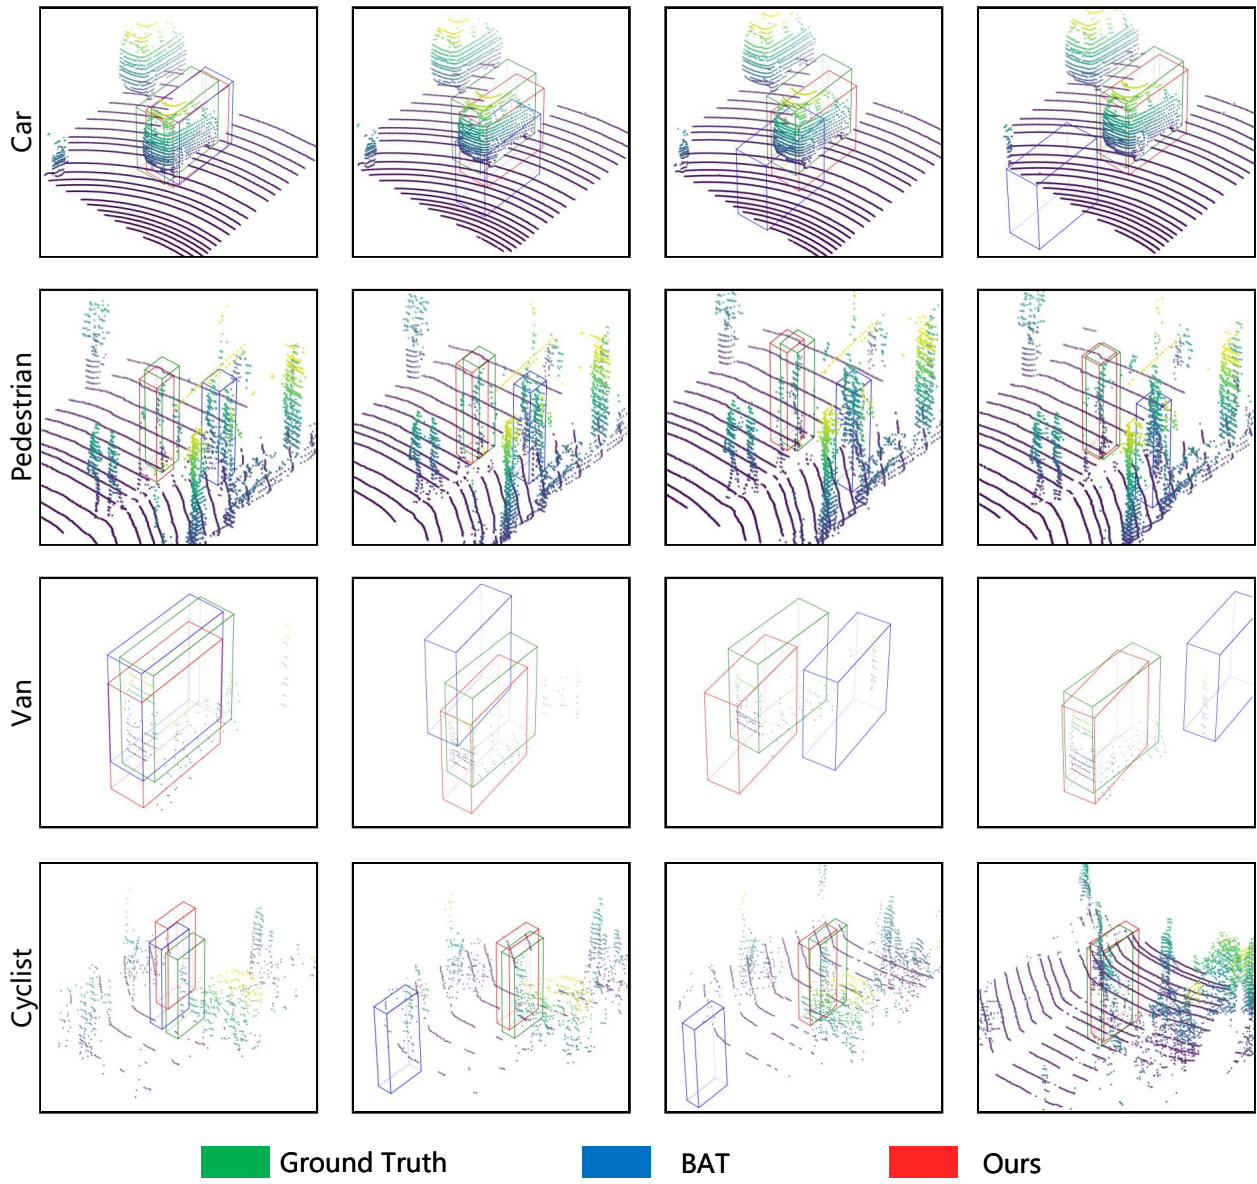

Figure 3. Visualization results. Our MixCycle and BAT are trained with 10% labels on KITTI.

Table 2. Comparison of MixCycle against fully-supervised methods on each category in KITTI. Improvements and decreases based on the same tracker are shown in **green** and **red**, respectively. **Bold** and underline denote the best and the second-best performance, respectively.

| Category     |     | Car           | Pedestrian   | Van    | Cyclist      | Mean   |              |        |              |        |              |        |
|--------------|-----|---------------|--------------|--------|--------------|--------|--------------|--------|--------------|--------|--------------|--------|
| Frame Number |     | 6424          | 6088         | 1248   | 308          | 14068  |              |        |              |        |              |        |
| Success      | 1%  | P2B [1]       | 8.11         | 3.61   | 8.10         | 5.60   | 6.11         |        |              |        |              |        |
|              |     | MLVSNet [2]   | <u>35.27</u> | 15.15  | <u>22.94</u> | 12.76  | <u>24.98</u> |        |              |        |              |        |
|              |     | BAT [4]       | 16.69        | 3.81   | 7.17         | 6.77   | 10.05        |        |              |        |              |        |
|              |     | Ours(P2B)     | 20.56        | 12.45↑ | <b>22.76</b> | 19.15↑ | 7.97         | 0.13↓  | 16.62        | 11.02↑ | 20.31        | 14.20↑ |
|              |     | Ours(MLVSNet) | <b>43.75</b> | 8.48↑  | <u>20.68</u> | 5.53↑  | <b>28.22</b> | 5.28↑  | <b>43.73</b> | 30.97↑ | <b>32.39</b> | 7.41↑  |
|              |     | Ours(BAT)     | 32.63        | 15.94↑ | 6.08         | 2.27↑  | 16.33        | 9.16↑  | <u>34.12</u> | 27.35↑ | 19.73        | 9.67↑  |
|              | 5%  | P2B [1]       | 33.99        | 20.31  | 12.10        | 5.73   | 25.51        |        |              |        |              |        |
|              |     | MLVSNet [2]   | 43.50        | 28.09  | <u>35.06</u> | 19.77  | 35.55        |        |              |        |              |        |
|              |     | BAT [4]       | 24.30        | 21.00  | 13.17        | 13.25  | 21.62        |        |              |        |              |        |
|              |     | Ours(P2B)     | 44.13        | 10.14↑ | <u>31.01</u> | 10.70↑ | 26.15        | 14.05↑ | 36.77        | 31.04↑ | 36.70        | 11.19↑ |
|              |     | Ours(MLVSNet) | <b>52.44</b> | 8.94↑  | 24.04        | 4.05↓  | <b>38.73</b> | 3.67↑  | <u>46.54</u> | 26.77↑ | 38.80        | 3.26↑  |
|              |     | Ours(BAT)     | <u>49.24</u> | 24.94↑ | <b>37.63</b> | 16.63↑ | 26.08        | 12.91↑ | <b>50.08</b> | 36.83↑ | <b>42.18</b> | 20.56↑ |
|              | 10% | P2B [1]       | 41.94        | 30.63  | 19.61        | 7.37   | 34.31        |        |              |        |              |        |
|              |     | MLVSNet [2]   | 48.21        | 24.76  | 37.90        | 24.89  | 36.64        |        |              |        |              |        |
|              |     | BAT [4]       | 43.96        | 28.84  | 18.12        | 35.84  | 34.95        |        |              |        |              |        |
|              |     | Ours(P2B)     | 45.82        | 3.88↑  | <b>41.59</b> | 10.96↑ | <b>42.59</b> | 22.98↑ | <u>52.14</u> | 44.77↑ | 43.84        | 9.53↑  |
|              |     | Ours(MLVSNet) | <u>54.08</u> | 5.87↑  | 30.39        | 5.63↑  | <u>41.29</u> | 3.39↑  | 49.95        | 25.06↑ | 42.60        | 5.97↑  |
|              |     | Ours(BAT)     | <b>55.19</b> | 11.23↑ | <u>38.62</u> | 9.78↑  | 34.92        | 16.8↑  | <b>55.52</b> | 19.68↑ | <b>46.23</b> | 11.28↑ |
| Precision    | 1%  | P2B [1]       | 7.39         | 2.24   | 6.07         | 4.42   | 4.98         |        |              |        |              |        |
|              |     | MLVSNet [2]   | <u>46.54</u> | 28.80  | <u>25.41</u> | 16.62  | <u>36.33</u> |        |              |        |              |        |
|              |     | BAT [4]       | 22.66        | 2.92   | 5.94         | 9.54   | 12.35        |        |              |        |              |        |
|              |     | Ours(P2B)     | 29.97        | 22.58↑ | <b>43.73</b> | 41.49↑ | 6.08         | 0.01↑  | 11.12        | 6.70↑  | 33.39        | 28.41↑ |
|              |     | Ours(MLVSNet) | <b>59.24</b> | 12.7↑  | <u>40.72</u> | 11.92↑ | <b>31.08</b> | 5.67↑  | <b>79.03</b> | 62.41↑ | <b>49.16</b> | 12.83↑ |
|              |     | Ours(BAT)     | 43.87        | 21.21↑ | 9.32         | 6.40↑  | 19.18        | 13.24↑ | <u>57.31</u> | 47.77↑ | 27.02        | 14.67↑ |
|              | 5%  | P2B [1]       | 45.99        | 40.26  | 10.82        | 5.43   | 39.50        |        |              |        |              |        |
|              |     | MLVSNet [2]   | 57.53        | 52.07  | <u>42.30</u> | 28.77  | 53.19        |        |              |        |              |        |
|              |     | BAT [4]       | 34.81        | 40.35  | 15.55        | 25.52  | 35.30        |        |              |        |              |        |
|              |     | Ours(P2B)     | 56.94        | 10.95↑ | <u>58.04</u> | 17.78↑ | 30.92        | 20.1↑  | 67.33        | 61.90↑ | 55.34        | 15.83↑ |
|              |     | Ours(MLVSNet) | <b>66.61</b> | 9.08↑  | 47.15        | 4.92↓  | <b>45.26</b> | 2.96↑  | <u>81.06</u> | 52.29↑ | <u>56.61</u> | 3.42↑  |
|              |     | Ours(BAT)     | <u>62.07</u> | 27.26↑ | <b>68.05</b> | 27.70↑ | 30.81        | 15.26↑ | <b>82.63</b> | 57.11↑ | <b>62.33</b> | 27.04↑ |
|              | 10% | P2B [1]       | 56.11        | 57.70  | 21.73        | 7.35   | 52.68        |        |              |        |              |        |
|              |     | MLVSNet [2]   | 63.63        | 48.31  | 44.65        | 35.08  | 54.69        |        |              |        |              |        |
|              |     | BAT [4]       | 57.25        | 56.08  | 21.48        | 19.69  | 52.75        |        |              |        |              |        |
|              |     | Ours(P2B)     | 58.30        | 2.19↑  | <b>72.05</b> | 14.35↑ | <b>51.83</b> | 30.1↑  | <u>83.18</u> | 75.83↑ | <u>64.22</u> | 11.54↑ |
|              |     | Ours(MLVSNet) | <u>67.36</u> | 3.73↑  | 56.28        | 7.97↑  | <u>50.01</u> | 5.36↑  | 82.52        | 47.44↑ | 61.36        | 6.67↑  |
|              |     | Ours(BAT)     | <b>70.02</b> | 12.77↑ | <u>69.83</u> | 13.75↑ | 42.28        | 20.8↑  | <b>85.37</b> | 65.68↑ | <b>67.81</b> | 15.06↑ |

Table 3. Comparison of MixCycle against fully-supervised methods on each category in NuScenes.

| Category     |      | Car           | Truck        | Trailer      | Bus          | Mean         |              |        |              |        |              |        |
|--------------|------|---------------|--------------|--------------|--------------|--------------|--------------|--------|--------------|--------|--------------|--------|
| Frame Number |      | 64159         | 13587        | 3352         | 2953         | 84051        |              |        |              |        |              |        |
| Success      | 0.1% | P2B [1]       | 15.77        | 13.09        | 12.81        | 16.12        | 15.23        |        |              |        |              |        |
|              |      | MLVSNet [2]   | 20.99        | 25.16        | 22.46        | 13.53        | 21.46        |        |              |        |              |        |
|              |      | BAT [4]       | 17.46        | 17.75        | 20.43        | 14.42        | 17.52        |        |              |        |              |        |
|              |      | Ours(P2B)     | 23.01        | 7.24↑        | 25.22        | 12.13↑       | 22.37        | 9.56↑  | 17.65        | 1.53↑  | 23.15        | 7.92↑  |
|              |      | Ours(MLVSNet) | <b>29.67</b> | 8.68↑        | <b>42.43</b> | 17.27↑       | <b>31.34</b> | 8.88↑  | <b>19.22</b> | 5.69↑  | <b>31.43</b> | 9.97↑  |
|              |      | Ours(BAT)     | <u>24.32</u> | 6.86↑        | <u>26.88</u> | 9.13↑        | <u>23.66</u> | 3.23↑  | 16.92        | 2.50↑  | <u>24.45</u> | 6.93↑  |
|              | 0.5% | P2B [1]       | 24.42        | 19.21        | 20.30        | 12.38        | 22.99        |        |              |        |              |        |
|              |      | MLVSNet [2]   | 29.82        | 32.25        | 27.40        | <u>22.74</u> | 29.87        |        |              |        |              |        |
|              |      | BAT [4]       | 27.71        | 22.85        | 25.48        | 15.44        | 26.40        |        |              |        |              |        |
|              |      | Ours(P2B)     | <b>36.85</b> | 12.43↑       | 28.23        | 9.02↑        | 21.75        | 1.45↑  | 21.14        | 8.76↑  | <u>34.30</u> | 11.31↑ |
|              |      | Ours(MLVSNet) | 31.49        | 1.67↑        | <b>46.75</b> | 14.50↑       | <b>48.49</b> | 21.09↑ | <b>28.47</b> | 5.73↑  | <b>34.53</b> | 4.66↑  |
|              |      | Ours(BAT)     | <u>32.20</u> | 4.49↑        | <u>38.22</u> | 15.37↑       | <u>31.04</u> | 5.56↑  | 21.82        | 6.38↑  | 32.76        | 6.36↑  |
|              | 1%   | P2B [1]       | 23.95        | 27.83        | 25.84        | 14.57        | 24.32        |        |              |        |              |        |
|              |      | MLVSNet [2]   | 33.23        | <u>39.08</u> | 39.62        | 22.23        | 34.04        |        |              |        |              |        |
|              |      | BAT [4]       | 30.66        | 32.73        | 32.83        | 17.81        | 30.63        |        |              |        |              |        |
|              |      | Ours(P2B)     | <u>34.80</u> | 10.85↑       | 35.24        | 7.41↑        | 30.40        | 4.56↑  | 22.61        | 8.04↑  | 33.43        | 9.10↑  |
|              |      | Ours(MLVSNet) | <b>40.61</b> | 7.38↑        | <b>45.43</b> | 6.35↑        | <b>58.09</b> | 18.47↑ | <b>35.38</b> | 13.15↑ | <b>41.90</b> | 7.86↑  |
|              |      | Ours(BAT)     | 33.72        | 3.06↑        | 37.29        | 4.56↑        | 45.55        | 12.72↑ | <u>24.26</u> | 6.45↑  | <u>34.44</u> | 3.81↑  |
| Precision    | 0.1% | P2B [1]       | 14.52        | 8.20         | 6.82         | 8.41         | 12.98        |        |              |        |              |        |
|              |      | MLVSNet [2]   | 20.45        | 19.97        | 11.31        | 6.35         | 19.51        |        |              |        |              |        |
|              |      | BAT [4]       | 16.31        | 12.16        | 9.19         | <u>12.22</u> | 15.21        |        |              |        |              |        |
|              |      | Ours(P2B)     | 23.48        | 8.96↑        | 18.88        | 10.68↑       | 11.20        | 4.38↑  | <b>13.99</b> | 5.58↑  | 21.91        | 8.94↑  |
|              |      | Ours(MLVSNet) | <b>31.05</b> | 10.60↑       | <b>38.57</b> | 18.60↑       | <b>19.45</b> | 8.14↑  | 11.53        | 5.18↑  | <b>31.12</b> | 11.60↑ |
|              |      | Ours(BAT)     | <u>24.10</u> | 7.79↑        | <u>21.07</u> | 8.91↑        | <u>13.81</u> | 4.62↑  | 9.67         | 2.55↓  | <u>22.69</u> | 7.48↑  |
|              | 0.5% | P2B [1]       | 24.28        | 12.32        | 11.08        | 6.98         | 21.21        |        |              |        |              |        |
|              |      | MLVSNet [2]   | 32.73        | 26.71        | 14.91        | <u>15.35</u> | 30.44        |        |              |        |              |        |
|              |      | BAT [4]       | 28.69        | 18.06        | 15.09        | 8.89         | 25.73        |        |              |        |              |        |
|              |      | Ours(P2B)     | <b>39.22</b> | 14.94↑       | 20.79        | 8.47↑        | 11.19        | 0.11↑  | 13.27        | 6.29↑  | <u>34.21</u> | 13.00↑ |
|              |      | Ours(MLVSNet) | <u>34.17</u> | 1.44↑        | <b>42.78</b> | 16.07↑       | <b>38.71</b> | 23.8↑  | <b>19.59</b> | 4.24↑  | <b>35.23</b> | 4.80↑  |
|              |      | Ours(BAT)     | 33.35        | 4.66↑        | <u>32.21</u> | 14.15↑       | <u>18.62</u> | 3.53↑  | 14.49        | 5.60↑  | 31.92        | 6.18↑  |
|              | 1%   | P2B [1]       | 23.70        | 22.86        | 14.11        | 7.51         | 22.61        |        |              |        |              |        |
|              |      | MLVSNet [2]   | 36.76        | 33.91        | 29.60        | 15.41        | 35.26        |        |              |        |              |        |
|              |      | BAT [4]       | 32.47        | 28.36        | 20.42        | 11.19        | 30.58        |        |              |        |              |        |
|              |      | Ours(P2B)     | 36.72        | 13.02↑       | 29.15        | 6.29↑        | 18.17        | 4.06↑  | 14.78        | 7.27↑  | 33.99        | 11.38↑ |
|              |      | Ours(MLVSNet) | <b>45.07</b> | 8.31↑        | <b>40.17</b> | 6.26↑        | <b>46.28</b> | 16.68↑ | <b>25.01</b> | 9.60↑  | <b>43.62</b> | 8.36↑  |
|              |      | Ours(BAT)     | 35.29        | 2.82↑        | 32.30        | 3.94↑        | <u>32.63</u> | 12.21↑ | <u>17.15</u> | 5.96↑  | 34.06        | 3.49↑  |

## References

- [1] Haozhe Qi, Chen Feng, Zhiguo Cao, Feng Zhao, and Yang Xiao. P2b: Point-to-box network for 3d object tracking in point clouds. In *Proceedings of the IEEE/CVF Conference on Computer Vision and Pattern Recognition*, pages 6329–6338, 2020. [1](#), [2](#), [4](#), [5](#)
- [2] Zhoutao Wang, Qian Xie, Yu-Kun Lai, Jing Wu, Kun Long, and Jun Wang. Mlvsnet: Multi-level voting siamese network for 3d visual tracking. In *Proceedings of the IEEE/CVF International Conference on Computer Vision*, pages 3101–3110, 2021. [1](#), [4](#), [5](#)
- [3] Na Zhao, Tat-Seng Chua, and Gim Hee Lee. Sess: Self-ensembling semi-supervised 3d object detection. In *Proceedings of the IEEE/CVF Conference on Computer Vision and Pattern Recognition*, pages 11079–11087, 2020. [1](#)
- [4] Chaoda Zheng, Xu Yan, Jiantao Gao, Weibing Zhao, Wei Zhang, Zhen Li, and Shuguang Cui. Box-aware feature enhancement for single object tracking on point clouds. In *Proceedings of the IEEE/CVF International Conference on Computer Vision*, pages 13199–13208, 2021. [1](#), [2](#), [4](#), [5](#)
